## **The Fragile X Mental Retardation Protein protects the lung from xenobiotic stress by facilitating the Integrated Stress Response**

Deblina Sain Basu<sup>1,2</sup>, Rital Bhavsar<sup>1</sup>, Imtiyaz Gulami<sup>1,2</sup>, Sai Manoz Lingamallu<sup>1,6</sup>, Ravi Muddashetty<sup>1</sup>, Chandrakanth Veeranna<sup>3</sup>, Sumantra Chattarji<sup>1,4,5</sup>, Rajesh Thimmulappa<sup>3</sup>, Aditi Bhattacharya<sup>1,4</sup> and Arjun Guha<sup>1\*</sup>

1. Institute for Stem Cell Science and Regenerative Medicine (inStem), GKVK Campus, Bangalore -560065
2. Trans Disciplinary University, Yelahanka, Bangalore
3. JSS Medical College, JSS Academy of Higher Education & Research, Mysore- 570015
4. Centre for Brain Development and Repair (CBDR), inStem, GKVK Campus, Bangalore -560065
5. National Centre for Biological Sciences, GKVK Campus, Bangalore- 560065
6. Manipal Academy of Higher Education, Madhav Nagar, Manipal-576104

\*Author to whom correspondence may be addressed: [arjung@instem.res.in](mailto:arjung@instem.res.in)

Keywords: Stress Response, Lung, Integrated Stress Response, FMR1, FMRP

1 **ABSTRACT**

2 Stress response pathways protect the lung from the damaging effects of environmental  
3 toxicants. Here we investigate the role of the Fragile X Mental Retardation Protein  
4 (FMRP), a multifunctional protein implicated in stress responses, in the lung. We report  
5 that FMRP is expressed in murine and human lungs, in the airways and more broadly.  
6 Analysis of airway stress responses in mice and in a murine cell line *ex vivo*, using the  
7 well-established Naphthalene (Nap) injury model, reveals that FMRP-deficient cells  
8 exhibit increased expression of markers of oxidative and genotoxic stress and increased  
9 cell death. We find that FMRP-deficient cells fail to actuate the Integrated Stress  
10 Response Pathway (ISR) and upregulate the transcription factor ATF4. Knockdown of  
11 ATF4 expression phenocopies the loss of FMRP. We extend our analysis of the role of  
12 FMRP to human bronchial BEAS-2B cells, using a 9, 10-Phenanthrenequinone air  
13 pollutant model, to find that FMRP-deficient BEAS-2B also fail to actuate the ISR and  
14 exhibit greater susceptibility. Taken together, our data suggest that FMRP has a  
15 conserved role in protecting the airways by facilitating the ISR.

## 16 INTRODUCTION

17 The epithelial lining of the respiratory tract is continually challenged by a diverse array of  
18 environmental toxicants including gases, particulates, and other biological agents.  
19 Exposure to these agents leads to increased oxidative, genotoxic and endoplasmic  
20 reticulum stress. Such stresses, when unmitigated, lead to cellular damage, inflammation  
21 and in the long term to decreased lung capacity and functionality. The aim of this study  
22 was to probe the mechanisms by which lungs cope with environmental stresses.

23 The capacity of the lung to manage xenobiotic stress is dependent on stress response  
24 proteins that are induced upon insult. In this regard, the Integrated Stress Response (ISR)  
25 pathway is an evolutionarily conserved pathway that is integral to how the lung copes with  
26 environmental challenges (Pakos-Zebrucka K et al., 2016; van 't Wout EF et al., 2014;  
27 Konsavage WM et al., 2012). The ISR is triggered by the activation of one or more of the  
28 four stress-responsive kinases GCN2, PKR, PERK and HRI. The activation of these  
29 kinases, in turn, sets in motion two separate but interdependent processes that enable  
30 cells to mount a restorative response (Wong HR & Wispe JR, 1997). First, these kinases  
31 phosphorylate the Eukaryotic Initiation Factor 2 $\alpha$  (eIF2 $\alpha$ ) and shut off ongoing programs  
32 of protein synthesis. The inhibition of translation leads to the sequestration of  
33 translationally active mRNAs into stress granules (SGs). Second, activation of the kinases  
34 also induces specialized modes of protein translation leading to the expression of stress  
35 response proteins. More specifically, these specialized translation regimes upregulate  
36 expression of Activating Transcription Factor 4 (ATF4) (Pakos-Zebrucka K et al., 2016;  
37 van 't Wout EF et al., 2014) and, in turn, ATF4 targets such as ATF3. ATF4 also  
38 synergizes with other transcription factors activated in response to stress like Nrf2, to  
39 induce the expression of other stress response genes (He CH et al., 2001; Sarcinelli C et  
40 al., 2020).

41 The Fragile X Mental Retardation Protein (FMRP) is a multifunctional protein that is  
42 expressed in the brain and more widely, in humans and other mammals alike.  
43 Deficiencies in FMRP lead to Fragile X Mental Retardation Syndrome (FXS), a disease  
44 characterized by mild-to-moderate intellectual disability (Zhou Z et al., 2014). FMRP  
45 function has been most intensively studied in the neuronal context wherein the protein

46 has been shown to regulate synaptic plasticity by multiple mechanisms (Santoro MR et  
47 al., 2012). Aside from this well-established role, several studies indicate that FMRP also  
48 has a role in facilitating stress responses. At a cellular level, FMRP has been shown to  
49 play an essential role in SG biogenesis in response to arsenite and heat shock-induced  
50 stress (Didiot MC et al., 2009; Linder B et al., 2008). A recent study on fibroblasts in FMR1  
51 KO mice showed that these cells are unable to mount a DNA Damage Response (DDR)  
52 when exposed to agents like Aphidicolin, 5-Hydroxyurea (5-HU) and UV but are able to  
53 do so in response to other types of DNA damaging agents (Alpatov R et al., 2014). The  
54 central finding of this study is that FMRP has a chromatin-dependent role in resolving  
55 stalled replication forks and single strand breaks in DNA (Alpatov R et al., 2014). The  
56 environmental toxicants that the lung is exposed to typically induce a wide spectrum of  
57 genotoxic perturbations. Whether the chromatin-dependent role of FMRP is essential in  
58 this milieu is not clear.

59 Our interest in candidate proteins that regulate the pulmonary stress response led us to  
60 explore the role of FMRP in the lung. Immunostaining of murine and human lungs  
61 revealed that the protein is expressed in the airway epithelium and more broadly. To  
62 probe the role of FMRP in stress responses in the airways, we subjected Fmr1 KO mice  
63 to Naphthalene injury, a well-established model for oxidative and genotoxic stress. We  
64 found that the airways of Fmr1 KO mice exhibited higher expression of markers of  
65 oxidative and genotoxic stress, and greater cell death, than wild type. These findings led  
66 us to investigate the role of FMRP in airway stress responses in mice, the involvement of  
67 the protein in the ISR, and its role in the human lung.

## 68 RESULTS

### 69 **FMRP is expressed in the airways and more broadly in the murine lung and protects** 70 **airway Club cells from Naphthalene induced stress**

71 To characterize the role of FMRP in the pulmonary stress response, we examined the  
72 expression of the protein in adult lungs from wild-type (WT) and Fmr1 KO animals. Lung  
73 sections from WT mice were stained with anti-FMRP antisera and examined under a  
74 confocal microscope (5  $\mu$ m, n>3 mice). FMRP expression was detected throughout the  
75 lung (Fig. 1A, 1C). We detected widespread protein expression in airway epithelium, both  
76 in secretory Club cells (CCs, marked by expression of Scgb1a1, Fig. 1A, 1C) and in  
77 ciliated cells (marked by expression of Acetylated Tubulin, AcTub). Outside of the  
78 airways, we noted intermittent expression in the alveolar parenchyma (Fig. 1A). Lung  
79 sections of Fmr1 KO mice stained with the same anti-FMRP antisera did not show any  
80 specific staining (airways shown in Fig. 1B, 1D, n>3 mice). Together, these experiments  
81 showed that FMRP is expressed in the murine lung, in the airways and more broadly. We  
82 also examined H&E stained lung sections from WT and Fmr1 KO mice to find no obvious  
83 abnormalities in Fmr1 KO lungs (Fig. S1 A-B).

84 To investigate the role of FMRP in the pulmonary stress response, we focused our  
85 attention on FMRP-expressing airway CCs and exposed WT and Fmr1 KO mice to a  
86 chemical that targets CCs. Airway CCs are highly sensitive to the polycyclic hydrocarbon  
87 Naphthalene (Nap) (Stripp BR et al., 1995; Van Winkle LS et al., 1995). Nap  
88 administration leads to the loss of the vast majority of CCs from the airway epithelium  
89 within 24-48 h and is a well-established model for lung injury (Guha A et al., 2014; Guha  
90 A et al., 2017). The susceptibility of airway CCs to Nap is due to the expression, in CCs,  
91 of the cytochrome P450 enzyme Cyp2f2 (Buckpitt A et al., 2002). Cyp2f2 converts Nap  
92 to Naphthalene oxide that causes DNA damage. Naphthalene oxide is also converted to  
93 Naphthoquinones that cause oxidative stress (Buckpitt A et al., 2002). The Cyp2f2  
94 isoform that converts Nap to cytotoxic derivatives is not expressed in humans and  
95 consequently Nap does not affect humans in the same way.

96 We exposed WT and Fmr1 KO animals to Nap and harvested lungs for analysis at  
97 different timepoints post injury (regimen shown schematically in Fig. 1E). To assess the  
98 extent of injury, we quantified frequencies of CCs across timepoints and examined  
99 expression of markers of oxidative and genotoxic stress. We found that the frequencies  
100 of CCs in WT were significantly higher than in Fmr1 KO at 24 h and 48 h respectively  
101 (Fig. 1F, n=3 mice per genotype per timepoint). In other words, cell loss was greater in  
102 Fmr1 KOs. Next, we stained sections from mouse lung both prior to and post Nap injury  
103 with two antisera: anti-4-Hydroxynonenal (4HNE, a product of lipid peroxidation and a  
104 marker of oxidative stress) and anti- $\gamma$ -H2AX (a phosphorylated histone variant that is a  
105 marker of double stranded DNA breaks and genotoxic stress). We did not detect  
106 expression of either stress marker in the lung in uninjured WT and Fmr1 KO mice (Fig.  
107 S1C, S1D, also Fig. 1G i- 1G ii, 1H i - 1H ii) and the expression of both markers was  
108 dramatically increased in Nap-injured lungs. Pertinently, we noted that the frequencies of  
109 CCs were higher and the levels of 4HNE and  $\gamma$ -H2AX expression were lower in WT than  
110 in Fmr1 KOs, at all timepoints examined (Fig. 1G iii -1G vi, 1H iii -1H vi, Fig. S1, n=3 mice  
111 per genotype per timepoint). Based on these data we concluded that CCs in Fmr1 KO  
112 animals are more susceptible to Nap-induced stress.

### 113 **The Club cell-like C22 cell line deficient in FMRP is also more susceptible to Nap** 114 **induced stress**

115 To further probe the role of FMRP in stress responses in CCs, we turned to the murine  
116 Club cell-like cell line, C22. C22 cells were isolated from H-2Kb-tsA58 mice expressing a  
117 temperature sensitive isoform of the SV40 Large T antigen under the H-2Kb promoter  
118 (Demello DE et al., 2002). To characterize these cells, we stained C22 cells with markers  
119 of CCs and other airway and alveolar lineages. Consistent with results from previous  
120 reports, these cells expressed the CC marker Scgb1a1 and did not express markers of  
121 other lineages (Fig. 2A, data not shown). To determine whether C22 could be utilized as  
122 a model for Nap injury, and to probe the role of FMRP therein, cells were stained with  
123 antisera against Cyp2f2 and FMRP. We found that C22 cells expressed modest levels  
124 of Cyp2f2 (Fig. 2B) and also expressed FMRP (Fig. 2C, n>6 experiments).

125 Next, we optimized methods for challenging C22 cells with Nap and for the knockdown of  
126 FMRP expression in these cells via RNA interference. Careful titration of Nap dosage  
127 and time of exposure (see methods) showed that a 1 h pulse of Nap was sufficient to  
128 induce expression of oxidative and genotoxic stress markers in C22 cells and marginally  
129 increase cell death 24 h post exposure. In an independent set of experiments, we  
130 established that treatment with 3 different Fmr1 siRNAs was sufficient to reduce FMRP  
131 levels expression by 80% or greater (see methods, compare FMRP expression in  
132 scrambled siRNA-treated cells, Sc, and Fmr1 siRNA-treated cells, Si in Fig. 2D, n>3  
133 experiments).

134 To determine if FMRP regulates susceptibility to Nap in C22 cells, we incubated control  
135 (scrambled siRNA-treated cells, Sc) and FMRP-depleted (Fmr1 siRNA-treated cells, Si)  
136 cells with Nap for 1 h and the harvested cells at different timepoints for analysis (shown  
137 schematically in Fig. 2E, see methods). To assess levels of oxidative and genotoxic  
138 stress, we stained cells with anti-4HNE and anti- $\gamma$ -H2AX respectively (Fig. 2F-2H). To  
139 assess Nap cytotoxicity, cells were subject to a WST-1 assay 24 h post exposure. We  
140 found that levels of 4HNE and  $\gamma$ -H2AX (Fig.2G-2I) were elevated in Fmr1-depleted cells  
141 at all timepoints (n=3 experiments each) and that Fmr1-depleted cells exhibited greater  
142 cell death in response to Nap (Fig. 2J). These data correlated well with the increased  
143 susceptibility of CCs to Nap in Fmr1 KO animals and demonstrated that FMRP has a cell  
144 intrinsic role in protecting cells from Nap.

145

### 146 **FMRP is required for the induction of the Integrated Stress Response pathway that** 147 **protects from Naphthalene induced stress**

148 The increased susceptibility of FMRP-deficient CCs and C22 cells to Nap led us to  
149 investigate further the role of FMRP in the Nap induced stress response. As mentioned  
150 previously, FMRP has been shown to regulate the formation of SGs in response to stress.  
151 SG biogenesis is an integral aspect of the stress response. However, it is currently  
152 unclear whether a defect in SG biogenesis alone can render cells more susceptible to  
153 stressful stimuli (Adjibade P et al., 2017). Nevertheless, in an effort to characterize the  
154 contribution of FMRP in the stress response, we probed SG biogenesis in control and

155 FMRP-depleted C22 cells post Nap. TIA1, Atx2 and G3BP are integral components of  
156 SGs in mammalian cells (Anderson P & Kedersha N, 2006; Anderson P & Kedersha N,  
157 2008). To determine whether the genesis of SGs was inhibited in FMRP-deficient C22  
158 cells 1 h post Nap, we stained Sc and Si cells with antisera against TIA1/Atx2 (anti-TIA1  
159 immunostaining shown in Fig. 3A, anti-Atx2 immunostaining shown in Fig. S2A). Confocal  
160 analysis showed that Sc cells contain a few sporadic SGs and the numbers of SGs  
161 increased dramatically 3, 6, and 12 h post Nap and returned to baseline by 24 h (Fig. 3A,  
162 Fig. S2A, n=3 experiments). Analysis of Si cells showed that these cells contain a few  
163 SGs in the untreated condition and that the numbers of SGs did not increase post Nap  
164 (Fig. 3A). Based on this analysis, we inferred that SG biogenesis is perturbed in FMRP-  
165 deficient cells post Nap. Co-staining cells with markers of SG and FMRP showed that  
166 FMRP has a punctate distribution both before and after Nap and that FMRP punctae were  
167 largely distinct from SGs. Based on these findings we concluded that FMRP regulates  
168 SG biogenesis in response to Nap.

169 In addition to a role in SG biogenesis, FMRP also has a chromatin-dependent role in  
170 resolving certain types of genotoxic stress. More specifically, FMRP-deficient cells fail to  
171 recruit  $\gamma$ -H2AX to stalled replication forks and single strand breaks in response to  
172 Aphidicolin, 5HU and UV exposure but are able to recruit  $\gamma$ -H2AX in response to gamma-  
173 radiation (Alpatov R et al., 2014). While it is plausible that FMRP serves a similar role in  
174 Nap-treated cells, we noted that the nuclear accumulation of  $\gamma$ -H2AX in FMR-deficient  
175 CCs and C22 cells post Nap was greater than in the respective controls. This suggested  
176 to us that the DNA Damage Response was at least partially active in FMR-deficient cells  
177 and, more importantly, that extent of DNA damage (as reported by nuclear  $\gamma$ -H2AX  
178 accumulation) was greater in FMR-deficient cells than in controls (see  
179 Discussion). Together, the data led us to hypothesize FMRP has a more general role in  
180 facilitating stress responses post Nap and led to investigate its role in the Integrated  
181 Stress Response (ISR) pathway.

182 As previously mentioned, the ISR is induced when one of four stress-responsive kinases  
183 (GCN2, PERK, HRI, PKR) phosphorylate eIF2 $\alpha$  at Serine 51. Phosphorylation of eIF2 $\alpha$   
184 arrests conventional translation, stimulates genesis of SGs and enables specialized



185 translation of stress response proteins like ATF4 (Pakos-Zebrucka K et al., 2016; van 't  
186 Wout EF et al., 2014). To probe the status of the ISR in C22 cells post Nap, we examined  
187 the phosphorylation state of eIF2 $\alpha$ . We exposed C22 cells to Nap for 1 h, harvested cells  
188 at various timepoints and quantified the levels of expression of both eIF2 $\alpha$  and  
189 phosphorylated eIF2 $\alpha$  (p-eIF2 $\alpha$ ). Western blot-based ratiometric quantitation of total and  
190 p-eIF2 $\alpha$  in Sc cells showed that p-eIF2 $\alpha$  levels increased 3 and 6 h post injury and  
191 decreased to baseline levels thereafter (Fig. 3B, Fig. S2B - S2C, n=5 experiments). We  
192 inferred that the ISR is induced in C22 in response to Nap. We then exposed Si cells to  
193 Nap for 1 h and found that, contrary to controls, the levels of p-eIF2 $\alpha$  did not increase  
194 post Nap (Fig. 3B, Fig. S2B - S2C, n=5 experiments). The analysis of p-eIF2 $\alpha$  suggested  
195 the FMRP-depletion might inhibit the ISR.

196 Next, we examined the expression of ATF4 and its target, ATF3, in control and FMRP-  
197 deficient cells. Sc and Si cells were stained with an anti-ATF4 antibody prior to and post  
198 Nap. In Sc, the expression of ATF4 was undetectable in untreated cells, increased  
199 dramatically 3, 6, 12 h post Nap treatment and then approached baseline levels at 24 h  
200 (Fig. 3C, Fig. S2D, n=3 experiments). In Si cells, levels of ATF4 were negligible in  
201 untreated cells and showed no appreciable increase post Nap. Next, we assayed ATF3  
202 levels by quantitative real-time PCR (qPCR).  
203 For this, RNA was isolated from Sc and Si cells at different timepoints and subjected it to  
204 qPCR analysis. In Sc, levels of ATF3 mRNA increased at 3, 6 h post Nap and returned  
205 to baseline thereafter (Fig. 3D, n=3 experiments). In Si, the levels ATF3 did not rise  
206 appreciably above baseline post Nap (Fig. 3D). These findings were also validated with  
207 anti-ATF3 immunostaining (data not shown). Based on these data we concluded that both  
208 ATF4 and ATF3 expression are perturbed in FMRP-deficient cells post Nap. Taken  
209 together, the findings showed that the ISR is perturbed in FMRP-deficient cells post Nap.

210 Next, we decided to investigate whether the upstream kinases that phosphorylate eIF2 $\alpha$   
211 and induce the ISR are activated (phosphorylated) in FMRP-deficient cells. We probed  
212 the expression of GCN2, PERK, HRI, PKR and their phosphorylated isoforms in Nap-  
213 treated C22 cells using commercially available antibodies (see methods). Among all pairs  
214 of antisera tested, antisera for PKR and p-PKR provided reproducible results. Western

215 blot-based ratiometric quantitation of p-PKR and total PKR in Sc and Si cells showed that  
216 the p-PKR levels increase in both Sc and Si 3 h post Nap (Fig. 3E, Fig. S2E - S2F, n=3  
217 experiments). Importantly, we noted that levels of p-PKR returned to baseline in Sc at 6  
218 h and later timepoints, but remained significantly higher in Si at later timepoints (Fig. 3E).  
219 This suggested that at least one of the stress responsive kinases (PKR) is activated in  
220 FMRP-deficient cells post Nap but is unable to actuate downstream processes.

221 Perturbations in the ISR in FMRP-deficient C22 cells post Nap provided a plausible  
222 explanation for why these cells are more susceptible to Nap. To test this, we decided to  
223 probe how perturbing the ISR, by knocking down levels of Atf4, would impact  
224 susceptibility to Nap. Control (Scrambled siRNA) and Atf4 siRNA treated C22 cells were  
225 exposed to Nap as described earlier and cells were harvested at different timepoints for  
226 analysis. ATF4 immunostaining of control and Atf4 siRNA-treated cells showed that  
227 siRNA treatment eliminated ATF4 expression in cells post Nap exposure (Fig. 3F). We  
228 also found that ATF4-depleted cells exhibited increased expression of 4HNE (Fig. 3G,  
229 representative images shown in Fig. S2G) and  $\gamma$ -H2AX (Fig. 3H, representative images  
230 shown in Fig. S2H) at all timepoints examined (n=3 experiments each, quantitation of cell  
231 fluorescence based on n>25 cells per experiment) and also increased cell death 24 h  
232 post injury (Fig. 3I). We concluded that the increased levels of oxidative and genotoxic  
233 stress and increased cytotoxicity observed in FMRP-deficient cells could be due to a  
234 failure to induce the ISR and upregulate ATF4.

235 In light of the findings in C22 cells, we examined whether perturbations to the ISR are  
236 also observed in FMRP-deficient CCs in Nap-treated mice. We counterstained sections  
237 from control and Fmr1 KO lungs post Nap with antisera to both ATF4 and ATF3. Although  
238 ATF4 immunostaining was inconclusive, we noted that the levels of ATF3 were negligible  
239 in CCs in the control lung and upregulated post Nap (Fig. S2I - S2J, sections from n=3  
240 mice). Pertinently, the levels of ATF3 in CCs in Fmr1 KO did not increase post Nap. These  
241 results are consistent with a role for FMRP in the induction of ISR in CCs post Nap.

242 **FMRP is expressed in the airways of the human lung and protects human bronchial**  
243 **BEAS-2B cells from 9, 10-Phenanthrenequinone induced stress**

244 The findings in the murine lung led us to ask whether FMRP has a conserved role in the  
245 human lung. To investigate this possibility, we first examined the distribution of FMRP in  
246 the human lung. Paraffin sections stained with FMRP antisera showed that FMRP is  
247 expressed throughout the airways and more broadly (Fig. 4A, n=2 sections each from  
248 n=5 independent lung biopsies). Triple labeling experiments with markers for ciliated cells  
249 and CCs showed that FMRP is expressed in both ciliated and non-ciliated cells, including  
250 CCs. Based on the distribution of FMRP we surmised that the protein could play a role in  
251 the airways in the human lung as well.

252 The BEAS-2B cell line is derived from normal human airways. These cells do not express  
253 markers of ciliated cells and, akin to CCs, have characteristics of non-ciliated cells. We  
254 stained BEAS-2B cells with FMRP antisera to find that these cells expressed FMRP (Fig.  
255 4B, n>6 experiments). We then proceeded to develop an assay to probe the role of FMRP  
256 in stress responses in these cells.

257 Since the susceptibility of airway CCs to Nap is not recapitulated in the human lung or in  
258 BEAS-2B cells (data not shown), we utilized a different injury model to probe the role of  
259 FMRP in stress responses in human cells. 9, 10-Phenanthrenequinone (PQ) is an air  
260 pollutant that is present at high levels in diesel exhaust particles and is known to trigger  
261 oxidative and genotoxic stress (Lavrich KS et al., 2018). As part of our characterization  
262 of PQ, we first exposed control (scrambled siRNA-treated cells) and FMRP-depleted  
263 (Fmr1 siRNA-treated cells) C22 cells to a pulse of PQ for 1 h (see methods) and harvested  
264 cells at different timepoints for analysis (shown schematically in Fig. S3A). Consistent  
265 with our findings in the Nap model, we found that FMRP-depleted C22 cells exhibited  
266 increased expression of 4HNE (Fig. S3B) and  $\gamma$ -H2AX (Fig. S3C) and increased cell  
267 death 24 h post exposure (Fig. S3D). We then examined ATF4 expression to find that  
268 although ATF4 levels increased in Sc cells at 3 h, 6 h post PQ, no expression was  
269 detected in Si cells (Fig. S3E). These experiments showed that PQ treatment does lead  
270 to oxidative and genotoxic stress and that, FMRP-deficient C22 cells are more  
271 susceptible.

272 Next, we exposed control (scrambled siRNA-treated cells) and FMRP-depleted (FMR1  
273 siRNA-treated cells) BEAS-2B cells to a pulse of PQ for 1 h and harvested them at  
274 different timepoints for analysis (shown schematically in Fig. 4D). We determined  
275 independently that the protocol for the knockdown of FMRP in BEAS-2B cells lead to a  
276 90% reduction in the levels of FMRP post treatment (Fig. 4C, n>3 experiments). We found  
277 that FMRP-depleted cells exhibited increased expression of 4HNE (Fig. 4E-4F) and  $\gamma$ -  
278 H2AX (Fig. 4G-4H) at all timepoints examined (n=3 experiments each, quantitation of cell  
279 fluorescence based on n>25 cells per experiment) and increased cell death 24 h post  
280 injury (see methods, Fig. 4I). These experiments showed that FMRP-deficient BEAS2B  
281 cells are more susceptible to PQ.

### 282 **FMRP is required for the induction of the Integrated Stress Response pathway that** 283 **protects from 9, 10-Phenanthrenequinone induced stress**

284 Next, we determined whether FMRP is required for the induction of the ISR in BEAS-2B  
285 cells. As described previously, we probed the activation status of PKR (ratiometric  
286 quantitation of p-PKR and total PKR in both control cells (Scrambled siRNA-treated, Sc)  
287 and FMRP-deficient cells (Fmr1 SiRNA-treated, Si) Fig. 5A, Supplementary Fig. 4A-4B,  
288 n=3), the phosphorylation status of eIF2 $\alpha$  (Fig. 5B, Fig. S4C - S4D, n=5), the formation of  
289 SGs (Fig. 5C, Fig. S4E n=3), the levels of ATF4 induction (Fig. 5D-5E, n=3) and the levels  
290 of ATF3 induction (Fig. 5F, n=3) at different times post PQ. These experiments showed  
291 that although p-PKR levels were increased in both Sc and Si post PQ, all of the  
292 downstream processes of the ISR were perturbed in Si. We concluded that FMRP is  
293 required for the ISR in BEAS-2B cells post PQ.

294 Next, we investigated whether the loss of ATF4 would recapitulate the loss of FMRP post  
295 PQ. Control (Scrambled siRNA) and ATF4 siRNA treated BEAS-2B cells were exposed  
296 to PQ as previously described and cells were harvested at different timepoints for  
297 analysis. Consistent with expectations, ATF4 siRNA-treated cells showed no anti-ATF4  
298 immunostaining post PQ exposure (Fig. 5G, n>3 experiments). We found that ATF4-  
299 depleted BEAS-2B cells exhibited increased expression of 4HNE (Fig. 5H, representative  
300 images shown in Fig. S4F) and  $\gamma$ -H2AX (Fig. 5I, representative images shown in Fig.

301 S4G) and increased cell death 24 h post injury (see methods, Fig. 5J). These data  
302 indicated that the loss of ATF4 largely phenocopies the loss of FMRP in PQ-treated  
303 BEAS-2B cells.

## 304 DISCUSSION

305 The aim of this study was to probe the role of FMRP in stress responses in the lung. We  
306 report that FMRP plays an essential role in protecting the airways in mice, and potentially  
307 in humans, from the deleterious effects of xenobiotic stress. Our studies provide strong  
308 evidence that FMRP protects the lung by facilitating the induction of the ISR (see model,  
309 Fig. 6). In the paragraphs that follow we will discuss the plausible mechanism/s by which  
310 FMRP may regulate the ISR, the possibility that FMRP regulates stress response  
311 pathways in addition to the ISR, and the clinical implications of the findings reported here.

312 A major finding of our study is that FMRP is required for the actuation of the ISR pathway.  
313 More specifically, we find that the stress responsive kinase PKR is activated in FMRP-  
314 deficient cells but that the phosphorylation of the PKR substrate, eIF2 $\alpha$ , is perturbed. The  
315 mechanism by which FMRP regulates this step is currently unknown. The analysis of  
316 FMRP-binding proteins in neuronal and other tissues has identified numerous interacting  
317 partners. Interestingly, among these interacting partners are the proteins Caprin1 and  
318 G3BP that have independently been implicated in the induction of the ISR pathway in  
319 response to stress (Taha MS et al., 2020; Wu Y et al., 2016). Pertinently, both Caprin1  
320 and G3BP1 have been shown to be important for eIF2 $\alpha$  phosphorylation (Reineke LC et  
321 al., 2015). Thus, it is plausible that FMRP acts in concert with Caprin1 and G3BP1 to  
322 facilitate eIF2 $\alpha$  phosphorylation. Although eIF2 $\alpha$  phosphorylation is an early event in the  
323 ISR pathway and perturbations at this stage are likely to affect all downstream processes,  
324 our data do not allow us to rule out the possibility that FMRP has independent roles in  
325 downstream processes. FMRP could, for example, also have an independent role in  
326 stress granule biogenesis (Didiot MC et al., 2009; Linder B et al., 2008). Our future  
327 experiments will probe these possibilities.

328 Studies that have examined the role of FMRP vis-à-vis stress responses suggest that  
329 FMRP could protect cells from stress in myriad ways. For example, it has been  
330 demonstrated that FMRP plays a chromatin-dependent role in inducing the DDR. This  
331 could be relevant in the context of the lung. Along the same lines, there is also evidence  
332 that FMRP regulates the expression of Superoxide Dismutase1 (SOD1) in the brain

333 (Bechara EG et al., 2009). Levels of SOD1 are reduced in the brains of Fmr1 KO animals.  
334 Since SOD1 has an important role in protecting cells from stress, FMRP could alter the  
335 susceptibility of tissues to stressful stimuli by altering the baseline levels of SOD1. To  
336 investigate this possibility, we probed levels of SOD1 in the brain and lung using both  
337 Western Blot and immunohistochemical approaches (Fig. S5A). Although we did observe  
338 that SOD1 levels in the brain were lower in Fmr1 KO than wild type, the levels of SOD1  
339 in the lung were comparable. Moreover, we also analyzed SOD1 levels in the bronchial  
340 cell lines (C22 and BEAS-2B) with or without FMRP to find that SOD1 levels were  
341 comparable (Fig. S5D - S5I). Taken together, these data show FMRP is unlikely to  
342 regulate SOD1 expression in the lung. Nevertheless, the role of  
343 FMRP in the DDR, and in the regulation of SOD1 expression, show that FMRP can  
344 contribute toward protecting tissues from stress by ISR-independent mechanisms as well.

345 Although FMRP is broadly expressed in humans and mice alike  
346 (<https://www.genecards.org/cgi-bin/carddisp.pl?gene=FMR1>), historically, FMRP has  
347 almost exclusively been studied in a neural context due to its connection with intellectual  
348 disability. An important finding of this study is that it demonstrates a role for FMRP in the  
349 lung and points to a potential vulnerability in individuals with an FMR1 deficiency.  
350 Clinically, the bulk of the case studies on FXS patients are derived from geographic  
351 regions where the load of pulmonary environmental stressors is low. Our study suggests  
352 that individuals with FXS living in areas of higher pollutant load may be more susceptible  
353 to lung damage/disease and FMRP status in the lung may be a strong correlate of  
354 resilience to pulmonary insults.

## 355 **MATERIALS AND METHODS**

356 All animal work reported here has been approved by the Internal Animal Users Committee  
357 (IAUC) and the Institutional Animal Ethics Committee (IAEC) at inStem. Any procedure  
358 that could conceivably cause distress to the animals employed pre-procedural anesthesia  
359 with isoflurane gas (Baxter Healthcare Corp.), delivered by an anesthetic vaporizing  
360 machine. All animals were monitored for signs of distress and euthanized if in distress.  
361 The analysis of human biopsies was approved by Institutional Ethics Committee of JSS  
362 Medical College.

### 363 **Mouse strains**

364 Fmr1 knockout mice (*Mus musculus*) strain was maintained on a C57B6/J background at  
365 the Centre for Brain Development and Repair (CBDR), inStem. Genotyping of the animals  
366 was done using established protocols (Bakker CE et al., 1994).

### 367 **Human samples**

368 Human (*Homo sapiens*) lung tissue was obtained from five subjects at autopsy by a  
369 forensic pathologist from JSS Medical College, Mysore. The cause of death was not  
370 attributed to lung trauma. Deidentified samples were fixed in 4% paraformaldehyde at 4  
371 °C overnight, embedded in paraffin, and processed for immunohistochemical analysis.

### 372 **Cell lines and culture conditions**

373 Human lung (BEAS-2B) non-ciliated airway epithelial origin cell line was obtained from  
374 Johns Hopkins University (kind gift from Prof. S. Biswal) (Singh A et al., 2009). The murine  
375 Club cell line (C22) was purchased from ECACC, UK (cat no.07021401, #07D022). Both  
376 cell lines were tested for mycoplasma contamination and found to be negative. BEAS-  
377 2B were grown in DMEM: F12K (Gibco, USA, 21127030) (1:1) media, supplemented with  
378 10% FBS (Gibco,USA, 10082147) and Penicillin-Streptomycin (Gibco, USA, 1540122) at



379 37°C, 5% CO<sub>2</sub>. C22 cell line was maintained in a proliferative state as per suppliers'  
380 instructions and experiments were performed 24 h post differentiation. Experiments were  
381 conducted within 3rd to 7th passages for BEAS-2B and within 3rd to 12th passages for  
382 C22.

### 383 **Models for xenobiotic stress**

384 For Naphthalene (Nap) injury in mice, wild type or Fmr1 knockout mice aged (≥8 weeks  
385 of age) were injected intraperitoneally with Corn Oil (vehicle, Sigma, USA, C8267) or with  
386 Nap dissolved in corn oil (300 mg kg<sup>-1</sup>, (Sigma, USA, 147141 ) using established protocols  
387 (Guha A et al., 2014; Guha A et al., 2012). Animals were sacrificed 12 h, 24 h, 48 h after  
388 injection for analysis.

389 To establish an assay for Nap injury in C22 cells, we first determined that these cells  
390 expressed the cytochrome Cyp2f2 that converts Nap to stress-inducing derivatives.  
391 Having established this, we tested a range of concentrations of Nap (50 ug ml<sup>-1</sup> to 500 ug  
392 ml<sup>-1</sup>, in DMSO/DMEM). Nap was found to be stable in solution at concentrations upto 100  
393 ug mL<sup>-1</sup> and unstable at higher concentrations leading to cell death within 3h post  
394 exposure. Nap exposure at 50-75 ug ml<sup>-1</sup> (DMSO/DMEM, DMSO final concentration  
395 0.7%) for short (1 h) and long duration (24 h) led to a progressive increase in expression  
396 of stress markers and mild cytotoxicity after a 24 h period. To probe the effects of  
397 FMRP/ATF4 deficiency on susceptibility to Nap, cells were exposed to Nap at 75 ug ml<sup>-1</sup>  
398 (DMSO/DMEM, DMSO final concentration 0.7%) for a period 1h. Cells were then washed  
399 in PBS and chased for varying periods of time in complete medium.

400 It has been reported previously that 9,10-Phenanthrenequinone (PQ) causes a sharp  
401 decrease in the viability of BEAS-2B cells when administered to cells for 24 h at  
402 concentrations greater than 1 uM (Koike E et al., 2014). We reconfirmed these findings  
403 and determined the LD50 dose to be ~1.5 uM ((Sigma, USA, 275034), dissolved in  
404 DMSO/DMEM, DMSO final concentration 0.00002%). To probe the effects of  
405 FMRP/ATF4 deficiency on susceptibility to PQ, cells were exposed to PQ at 1.5 uM  
406 (DMSO/DMEM, DMSO final concentration 0.00002%) for a period 1h. Cells were then

407 washed with PBS and fresh complete media and chased for varying period's time in  
408 complete medium.

#### 409 **siRNA based knockdown of FMR1/ATF4 expression**

410 Several studies have demonstrated that multiple siRNA administered together or  
411 sequentially work more efficiently for silencing gene expression than a single siRNA  
412 (Wang Z et al., 2016; Föhling M et al., 2009; Zhang P et al., 20015; Hatch EM et al.,  
413 2010). For our studies we used 3 distinct siRNAs for each targeted gene. siRNAs were  
414 administered to cells sequentially, 12 h apart, to silence the gene expression. siRNA  
415 transfections were done with Lipofectamine 2000 (Thermofisher Scientific, USA,  
416 11668027). All xenobiotic stress assays in C22 cells were performed 36 h after treatment  
417 with the last siRNA. C22 cells were transferred from proliferative to differentiation-  
418 inducing media 12 h after the last Si RNA treatment and utilized for xenobiotic stress  
419 assays 24 h thereafter. All xenobiotic stress assays in BEAS-2B cells were performed 12  
420 h after treatment with the last siRNA. All siRNAs were obtained from Ambion: murine  
421 Fmr1 (Ambion, USA, 4390771), murine Atf4 (Ambion, USA, 16708), human FMR1  
422 (Ambion, USA, 4392420) and human ATF4 (Ambion, USA, 16708), and Scrambled  
423 (Negative control, Ambion, USA, 4390843). The assay IDs for each of siRNAs are as  
424 follows: Mouse Fmr1 siRNA (Assay ID: 5315, 5317, s66177), Human FMR1 siRNA  
425 (Assay ID: 5315, 5316, 5317), Mouse Atf4 siRNA (Assay ID: 160775, 160776, 160777),  
426 Human ATF4 siRNA (Assay ID: 122168, 122287, 122372).

#### 427 **Cell Cytotoxicity assay**

428 C22 and BEAS-2B cells were inoculated into 96-well plate and treated with Nap or PQ for  
429 1h, as described above, and harvested for analysis 24 h later. Cell viability was assayed  
430 using WST-1 reagent (Sigma, USA, 5015944001)). Briefly, cells were incubated with  
431 WST-1 for 4h and absorbance readings were taken and analyzed as per manufacturer's  
432 protocols. Cytotoxicity percentage=100 X [(OD (450nm-650nm) of untreated cells-OD  
433 (450nm-650nm) of treated cells)/ OD (450nm-650nm) of untreated cells].

## 434 **Histology, Immunofluorescence and Imaging**

435 Lungs were inflated with 4% (wt/vol) Paraformaldehyde (Alfa Aesar, USA, 30525-89-4) in  
436 PBS and fixed for 8 hours at 4°C. Fixed lungs were subsequently embedded in paraffin,  
437 sectioned (5  $\mu$ m) and processed for immunohistochemical analysis post heat-mediated  
438 antigen retrieval at pH 6.0 (Vector Labs, USA) except sections stained with anti-SOD1  
439 antisera that were subject to antigen retrieval at pH 9.0 (Vector Labs, USA). For cellular  
440 immunostaining, cells were seeded on coated coverslips (0.1% gelatin, Sigma, USA,  
441 G9391, as per manufacturer's protocol). Post-treatment, cells were fixed with 4% PFA for  
442 30 minutes and blocked with 2%FBS, 0.2% BSA and 0.1% Triton X 100 in 1X PBS for an  
443 hour and stained. Primary antibodies were diluted using the same blocking solution.  
444 Immunohistochemical analysis utilized the following antisera: rabbit anti-FMRP (Abcam,  
445 UK, 17722, 1:500), rabbit anti-FMR1 (Sigma, USA, 1:200), goat anti-Scgb1a1 (Santa  
446 Cruz, USA, Sc365992, 1:500), mouse anti-acetylated tubulin (Sigma, USA, T7451,  
447 1:1000), mouse anti-4HNE (Abcam, UK, ab48506, 1:500), rabbit anti-  $\gamma$ -H2AX (Novus  
448 biological, USA, NB100-384, 1:1000), mouse anti-Cyp2f2 (Santa Cruz, USA, 1:200),  
449 mouse anti-ATF4 (Sigma, USA, WH0000468M1, 1:200), goat-Anti-Tia1 (Santa Cruz,  
450 USA, SC1751, 1:200), and Alexa 488/568/647-conjugated donkey anti-mouse/rabbit/goat  
451 secondary antibodies (Invitrogen, USA, 1:300). Stained sections were mounted in  
452 ProLong Diamond (Invitrogen, USA, P36962). All samples were imaged on a FV3000 4-  
453 laser confocal microscope or on a Zeiss LSM-780 (Carl Zeiss AG, Germany) laser-  
454 scanning confocal microscope.

## 455 **Quantitative fluorescence microscopy**

456 Frequencies of Club cells/mm airway, and total cellular fluorescence in Club cells, in lung  
457 sections, were determined from single tiled optical sections acquired on a confocal  
458 microscope using ImageJ software. For Club cell frequency analysis, cells attached to the  
459 basement membrane were counted per section per animal. Total cellular fluorescence  
460 intensity was calculated by subtracting a "background" value per section from the  
461 integrated density per cell (outlined using the software) (for FMRP, 4HNE,  $\gamma$ -H2AX and  
462 ATF4). The "background" value was determined by sampling integrated density of regions

463 on the section devoid of cells. Total cellular fluorescence of C22 and BEAS-2B cells was  
464 estimated from single optical sections on a confocal microscope using ImageJ software.  
465 In all experiments involving C22 and BEAS-2B cells,  $\geq 25$  cells were analyzed per  
466 timepoint, per experiment,  $n=3$  experiments. The images of Scgb1a1 and Cyp2f2  
467 expression in C22 cells, and of stress granule markers in BEAS-2B and C22 cells, are  
468 maximum intensity projection images of z-stacks acquired on confocal microscope.

### 469 **Western blot analysis**

470 Protein was extracted from cell lysates using RIPA buffer (ThermoFisher Scientific, USA,  
471 89900) containing Sigmafast EDTA free protease inhibitor cocktail (Sigma, USA, s8830)  
472 and Phosstop (Merk, USA, 4906845001). Total protein was run on a 12% SDS PAGE,  
473 transferred onto a nitrocellulose membrane (Amersham, UK, 10600002), and the  
474 membrane was stained with reversible MemCode (ThermoFisher Scientific, USA, 24580)  
475 for total protein estimation (imaged on ImageQuant600 (Amersham, UK) and quantified  
476 using ImageJ). The membrane was subsequently de-stained, blocked with 5% BSA  
477 (Sigma, USA, A9418) for 1 h and probed using the following primary antisera: rabbit anti-  
478 Phospho-eIF2 $\alpha$  (Ser51) (Cell Signalling Technology, USA, 9721S, 1:1000), mouse anti-  
479 eIF2 $\alpha$  (Cell Signalling Technology, USA, 2103S, 1:1000), rabbit anti-Phospho-PKR  
480 (Sigma, USA, SAB4504517, 1:3000), mouse anti-PKR (Santa Cruz, USA, Sc-6282,  
481 1:1000), rabbit anti-GCN2 (Cell Signalling Technology, USA, 3302s), mouse anti-  
482 Phospho-GCN2 (Cell Signalling Technology, USA, 3301S), rabbit anti-PERK (Cell  
483 Signalling Technology, USA, 3192s, 1:1000), rabbit anti-Phospho-PERK (Cell Signalling  
484 Technology, USA, 1379s), mouse anti-HRI (Santa Cruz, USA, sc-365239). Primary  
485 antisera was detected using the following secondary antisera: HRP-conjugated anti-rabbit  
486 (abcam, UK, 6721, 1:3000) and HRP-conjugated anti-mouse secondary (Invitrogen, USA,  
487 # 62-6520 1:5000) antibodies and ECL (BioRad, USA, 1620177) and analyzed (imaged  
488 on ImageQuant600 (Amersham, UK) and quantified using ImageJ). The levels of eIF2 $\alpha$ ,  
489 phospho-eIF2 $\alpha$ , PKR and Phospho-PKR were normalized to the total protein content of  
490 the respective lanes.

491 **Quantitative PCR (qPCR) analysis**

492 RNA from cell lysates was extracted using Trizol (Invitrogen, USA, 15596018, as per  
493 manufacturer's protocol) and qPCR was performed using the primers listed in the  
494 following table. The qPCR assays were constituted with the Maxima SYBR green/ROX  
495 qPCR Mastermix (2X) (Thermo Scientific, USA, K0221) and analyzed on a BioRad CFX3  
496 real-time PCR system (BioRad, USA).

| <b>Gene</b>                     | <b>Sequence</b>        |
|---------------------------------|------------------------|
| ATF3 Human Forward primer       | GTACCCAGGCTTTAGCATT    |
| ATF3 Human Reverse primer       | TTAATAGACAGTAGCCAGCG   |
| Beta actin Human Forward primer | AAACTGGAACGGTGAAGGT    |
| Beta actin Human Reverse primer | ACAACGCATCTCATATTTGGAA |
| ATF3 Mouse Forward primer       | GAGATGTCAGTCACCAAGTC   |
| ATF3 Mouse Reverse primer       | TCCAGTTTCTCTGACTCTTTC  |
| Beta actin Mouse Forward primer | CTTCCAGCAGATGTGGATCAG  |
| Beta actin Mouse Reverse primer | AAAACGCAGCTCAGTAACAGT  |

497 **Statistical Analysis**

498 Statistical significance of datasets was assessed using unpaired two-tailed t-tests post  
499 Shapiro-Wilk tests for normality. Data were also analysed using a two-way ANOVA to  
500 compare changes in two groups with respect to time, genotype and interaction  
501 parameters. ANOVA data and normality test results for each figure are presented (Table  
502 S1 - S9) in a tabular format.

503 **ACKNOWLEDGEMENTS**

504 We thank Joseph Jomon, National Centre for Cell Science (NCCS), Pune for sharing  
505 antibodies; Aditya Deshpande, inStem for assistance in animal experiments; Sarfaraz  
506 Nawaz and Sudhriti Ghosh Dastidar, inStem for their assistance with biochemical  
507 analyses; Harlin Kaur, Binita Dam, Arnab Karmakar, Saraswati Chavda and Mamta  
508 Yadav for technical assistance; and the Central Imaging and Flow Cytometry Facility  
509 (CIFF) and Animal Care and Resource Center (ACRC) Facility at Bangalore Life Science  
510 Cluster (BLiSC) for their constant support.

511 **COMPETING INTERESTS**

512 The authors declare no competing interests.

513 **FUNDING**

514 This work was funded by inStem core funds and the Ramalingaswami Reentry Fellowship  
515 (AG, RB), and fellowships from Department of Biotechnology (SML), Indian Council of  
516 Medical Research (IG) and University Grants Commission-Council of Scientific &  
517 Industrial Research (DSB).

518 **REFERENCES**

519 **Adjibade P, St-Sauveur VG, Bergeman J, Huot ME, Khandjian EW, Mazroui R.** (2017).  
520 DDX3 regulates endoplasmic reticulum stress-induced ATF4 expression. *Sci. rep.* **7**, 1-2. doi:  
521 10.1038/s41598-017-14262-7

522 **Alpatov R, Lesch BJ, Nakamoto-Kinoshita M, Blanco A, Chen S, Stützer A, Armache**  
523 **KJ, Simon MD, Xu C, Ali M, Murn J.** (2014). A chromatin-dependent role of the fragile X  
524 mental retardation protein FMRP in the DNA damage response. *Cell.* **157**, 869-881. doi:  
525 10.1016/j.cell.2014.03.040

526 **Anderson P & Kedersha N.** (2006). RNA granules. *J. Cell. Biol.* **172**, 803-808. doi:  
527 10.1083/jcb.200512082

528 **Anderson P & Kedersha N.** (2008). Stress granules: the Tao of RNA triage. *Trends Biochem.*  
529 *Sci.* **33**, 141-150. doi: 10.1016/j.tibs.2007.12.003

530 **Bakker CE, Verheij C, Willemsen R, van der Helm R, Oerlemans F, Vermey M, Bygrave**  
531 **A, Hooegeven A, Oostra BA, Reyniers E, De Boule K.** (1994). Fmr1 knockout mice: a model  
532 to study fragile X mental retardation. *Cell.* **78**, 23-33. doi:10.1016/0092-8674(94)90569-X

533 **Bechara EG, Didiot MC, Melko M, Davidovic L, Bensaid M, Martin P, Castets M,**  
534 **Pognonec P, Khandjian EW, Moine H, Bardoni B.** (2009). A novel function for fragile X  
535 mental retardation protein in translational activation. *PLoS. Biol.* **7**, e16. DOI:  
536 10.1371/journal.pbio.1000016

537 **Buckpitt A, Boland B, Isbell M, Morin D, Shultz M, Baldwin R, Chan K, Karlsson A, Lin**  
538 **C, Taff A, West J.** (2002). Naphthalene-induced respiratory tract toxicity: metabolic  
539 mechanisms of toxicity. *Drug. Metab. Rev.* **34**, 791-820. doi:10.1081/DMR-120015694

540 **de Diego-Otero Y, Romero-Zerbo Y, el Bekay R, Decara J, Sanchez L, Rodriguez-de**  
541 **Fonseca F, del Arco-Herrera I.** (2009). Alpha-tocopherol protects against oxidative stress in  
542 the fragile X knockout mouse: an experimental therapeutic approach for the Fmr1 deficiency.  
543 *Neuropsychopharmacology.* **34**, 1011-1026. doi:10.1038/npp.2008.152

544 **Demello DE, Mahmoud S, Ryerse J, & Hoffmann JW.** (2002). Generation and  
545 characterization of a conditionally immortalized lung clara cell line from the H-2Kb-tsA58  
546 transgenic mouse. *In. Vitro. Cell. Dev. Biol. Anim.* **38**, 154-164. doi:10.1290/1071-  
547 2690(2002)038<0154:GACOAC>2.0.CO;2

548 **Didiot MC, Subramanian M, Flatter E, Mandel JL, Moine H.** (2009). Cells lacking the  
549 fragile X mental retardation protein (FMRP) have normal RISC activity but exhibit altered  
550 stress granule assembly. *Mol. bio. cell.* **20**, 428-37. doi:10.1091/mbc.e08-07-0737

551 **El Bekay R, Romero-Zerbo Y, Decara J, Sanchez-Salido L, Del Arco-Herrera I,**  
552 **Rodríguez-de Fonseca F, De Diego-Otero Y.** (2007). Enhanced markers of oxidative stress,  
553 altered antioxidants and NADPH-oxidase activation in brains from Fragile X mental

554 retardation 1-deficient mice, a pathological model for Fragile X syndrome. *Eur. J. Neurosci.*  
555 **26**, 3169-80. doi:10.1111/j.1460-9568.2007.05939.x

556 **Fähling M, Mrowka R, Steege A, Kirschner KM, Benko E, Förstera B, Persson PB,**  
557 **Thiele BJ, Meier JC, Scholz H.** (2009). Translational regulation of the human achaete-scute  
558 homologue-1 by fragile X mental retardation protein. *J. Bio. Chem.* **284**, 4255-66. doi:  
559 10.1074/jbc.M807354200

560  
561 **Guha A , Vasconcelos M, Zhao R, Gower AC, Rajagopal J, Cardoso WV.** (2014).  
562 Analysis of Notch signaling-dependent gene expression in developing airways reveals  
563 diversity of Clara cells. *PLoS. One.* **9**, e88848. doi:10.1371/journal.pone.0088848

564 **Guha A, Deshpande A, Jain A, Sebastiani P, Cardoso WV.** (2017). Uroplakin 3a+ cells are  
565 a distinctive population of epithelial progenitors that contribute to airway maintenance and  
566 post-injury repair. *Cell rep.* **19**, 246-54. doi:10.1016/j.celrep.2017.03.051.

567 **Guha A, Vasconcelos M, Cai Y, Yoneda M, Hinds A, Qian J, Li G, Dickel L, Johnson**  
568 **JE, Kimura S, Guo J, McMahon J, McMahon AP, and Cardoso WV.** (2012).  
569 Neuroepithelial body microenvironment is a niche for a distinct subset of Clara-like  
570 precursors in the developing airways. *PNAS.* **109**, 12592–12597.  
571 doi:10.1073/pnas.1204710109

572  
573 **Hatch EM, Kulukian A, Holland AJ, Cleveland DW and Stearns T.J.** (2010). Cep152  
574 interacts with Plk4 and is required for centriole duplication. *Cell Biol.* **191**, 721–729. doi:  
575 10.1083/jcb.201006049

576 **He CH, Gong P, Hu B, Stewart D, Choi ME, Choi AM, Alam J.** (2001). Identification of  
577 activating transcription factor 4 (ATF4) as an Nrf2-interacting protein. Implication for heme  
578 oxygenase-1 gene regulation. *J. Biol. Chem.* **276**, 20858-20865. doi: 10.1074/jbc.M101198200

579 **Koike E, Yanagisawa R, Takano H.** (2014). Toxicological effects of polycyclic aromatic  
580 hydrocarbons and their derivatives on respiratory cells. *Atmos. Environ.* **97**, 529-36.  
581 doi:10.1016/j.atmosenv.2014.04.003

582 **Konsavage WM, Zhang L, Wu Y, & Shenberger JS.** (2012). Hyperoxia-induced activation  
583 of the integrated stress response in the newborn rat lung. *Am. J. Physiol. Lung. Cell. Mol.*  
584 *Physiol.* **302**, L27-35.; doi:10.1152/ajplung.00174.2011.

585 **Lavrach KS, Corteselli EM, Wages PA, Bromberg PA, Simmons SO, Gibbs-Flournoy EA,**  
586 **Samet JM.** (2018). Investigating mitochondrial dysfunction in human lung cells exposed to  
587 redox-active PM components. *Toxicol. Appl. Pharmacol.* **342**, 99-107. doi:  
588 10.1016/j.taap.2018.01.024

589 **Li G, Scull C, Ozcan L, and Tabas I. J.** (2010). NADPH oxidase links endoplasmic reticulum  
590 stress, oxidative stress, and PKR activation to induce apoptosis. *Cell Biol.* **191**, 1113–1125.  
591 doi:10.1083/jcb.201006121



592 **Lima-Cabello E, Garcia-Guirado F, Calvo-Medina R, el Bekay R, Perez-Costillas L,**  
593 **Quintero-Navarro C, Sanchez-Salido L, de Diego-Otero Y.** (2016). An Abnormal Nitric  
594 Oxide Metabolism Contributes to Brain Oxidative Stress in the Mouse Model for the Fragile  
595 X Syndrome, a Possible Role in Intellectual Disability. *Oxid. Med. Cell. Longev.* 8548910. doi:  
596 10.1155/2016/8548910

597 **Linder B, Plöttner O, Kroiss M, Hartmann E, Lagerbauer B, Meister G, Keidel E,**  
598 **Fischer U.** (2008). Tdrd3 is a novel stress granule-associated protein interacting with the  
599 Fragile-X syndrome protein FMRP. *Hum. Mol. Genet.* **17**, 3236-46. doi:10.1093/hmg/ddn219

600 **Lozon TI, Eastman AJ, Matute-Bello G, Chen P, Hallstrand TS, Altemeier WA.** (2011).  
601 PKR-dependent CHOP induction limits hyperoxia-induced lung injury. *Am. J. Physiol.-Lung*  
602 *Cell. Mol.* **300**, L422-L429. doi:10.1152/ajplung.00166.2010

603 **Pakos-Zebrucka K, Koryga I, Mnich K, Ljubic M, Samali A, Gorman AM.** (2016). The  
604 integrated stress response. *EMBO rep.* **17**, 1374-95. doi: 10.15252/embr.201642195.

605 **Reineke LC, Kedersha N, Langereis MA, van Kuppeveld FJ, Lloyd RE.** (2015). Stress  
606 granules regulate double-stranded RNA-dependent protein kinase activation through a  
607 complex containing G3BP1 and Caprin1. *M. Bio.* **6**, e02486-14. doi: 10.1128/mBio.02486-14

608 **Romero-Zerbo Y, Decara J, El Bekay R, Sanchez-Salido L, Del Arco-Herrera I, De**  
609 **Fonseca FR, De Diego-Otero Y.** (2008). Protective effects of melatonin against oxidative  
610 stress in Fmr1 knockout mice: a therapeutic research model for the fragile X syndrome. *J.*  
611 *Pineal. Res.* **46**, 224-234. doi :10.1111/j.1600-079X.2008.00653.x

612 **Santoro MR, Bray SM, Warren ST.** (2012). Molecular mechanisms of fragile X syndrome:  
613 a twenty-year perspective. *Annu. Rev. Pathol.* **7**, 219-45 doi:10.1146/annurev-pathol-011811-  
614 132457

615 **Sarcinelli C, Dragic H, Piecyk M, Barbet V, Duret C, Barthelaix A, Ferraro-Peyret C,**  
616 **Fauvre J, Renno T, Chaveroux C, Manié SN.** (2020). ATF4-Dependent NRF2  
617 transcriptional regulation promotes antioxidant protection during endoplasmic reticulum  
618 stress. *Cancers.* **12**, 569. doi:10.3390/cancers12030569

619 **Singh A, Ling G, Suhasini AN, Zhang P, Yamamoto M, Navas-Acien A, Cosgrove G,**  
620 **Tuder RM, Kensler TW, Watson WH, Biswal S.** (2009). Nrf2-dependent sulfiredoxin-1  
621 expression protects against cigarette smoke-induced oxidative stress in lungs. *Free. Radic.*  
622 *Biol. Med.* **46**, 376-86. doi: 10.1016/j.freeradbiomed.2008.10.026

623 **Solomon S, Xu Y, Wang B, David M, Schubert P, Kennedy D, Schrader JW.** (2007).  
624 Distinct structural features of Caprin-1 mediate its interaction with G3BP-1 and its induction  
625 of phosphorylation of eIF2 $\alpha$ , entry to cytoplasmic stress granules, and selective interaction  
626 with a subset of mRNAs. *J. Mol. Cell. Bio.* **27**, 2324-2342. doi:10.1128/MCB.02300-06.

627 **Song G, Napoli E, Wong S, Hagerman R, Liu S, Tassone F, Giulivi C.** (2016). Altered  
628 redox mitochondrial biology in the neurodegenerative disorder fragile X-tremor/ataxia

629 syndrome: use of antioxidants in precision medicine. *Mol. Med.* **22**, 548-559. doi:  
630 10.2119/molmed.2016.00122

631 **Stripp BR, Maxson K, Mera R, & Singh G.** (1995). Plasticity of airway cell proliferation  
632 and gene expression after acute naphthalene injury. *Am. J. Physiol.* **269**, L791-799. doi:  
633 10.1152/ajplung.1995.269.6.L791

634 **Taha MS, Haghghi F, Stefanski A, Nakhaei-Rad S, Kazemineh NS, Al Kabbani**  
635 **MA, Görg B, Fujii M, Lang PA, Häussinger D, Piekorz RP.** (2020). Novel FMRP  
636 interaction networks linked to cellular stress. *FEBS J.* doi: 10.1111/FEBS.15443.

637 **van 't Wout EF, Hiemstra PS, & Marciniak SJ.** (2014). The integrated stress response in  
638 lung disease. *Am. J. Respir. Cell. Mol. Biol.* **50**, 1005-1009. doi: 10.1165/rcmb.2014-0019TR

639 **Van Winkle LS, Buckpitt AR, Nishio SJ, Isaac JM, & Plopper CG.** (1995). Cellular  
640 response in naphthalene-induced Clara cell injury and bronchiolar epithelial repair in mice.  
641 *Am. J. Physiol.* **269**, L800-818. doi:10.1152/ajplung.1995.269.6.L800

642 **Wang Z, Sun W, Cao J, Cui H, Ma Z.** (2016). Repeated Aurora-A siRNA Transfection  
643 Results in Effective Apoptosis of A549 Cells Compared to Single Transfection. *Clin. Lab.*  
644 **62**, 697-703. doi: 10.7754/clin.lab.2015.150836

645 **Wong HR & Wispe JR.** (1997). The stress response and the lung. *Am. J. Physiol.* **273**, L1-9.  
646 doi: 10.1152/ajplung.1997.273.1.L1

647 **Wu Y, Zhu J, Huang X, Du Z.** (2016). Crystal structure of a dimerization domain of human  
648 Caprin-1: insights into the assembly of an evolutionarily conserved ribonucleoprotein complex  
649 consisting of Caprin-1, FMRP and G3BP1. *Acta Crystallographica Section D: J. Struct. Bio.*  
650 **72**, 718-27. doi:10.1107/S2059798316004903

651 **Zhang P, Abdelmohsen K, Liu Y, Tominaga-Yamanaka K, Yoon JH, Ioannis G,**  
652 **Martindale JL, Zhang Y, Becker KG, Yang IH, Gorospe M & Mattson MP.** (2015).  
653 Novel RNA- and FMRP-binding protein TRF2-S regulates axonal mRNA transport and  
654 presynaptic plasticity. *Nat. Commun.* **6**, 8888. doi: 10.1038/ncomms9888

655 **Zhou Z, Cao M, Guo Y, Zhao L, Wang J, Jia X, Li J, Wang C, Gabriel G, Xue Q, Yi**  
656 **Y.** (2014). Fragile X mental retardation protein stimulates ribonucleoprotein assembly of  
657 influenza A virus. *Nat. Commun.* **5**, 3259. doi: 10.1038/ncomms4259

Figure-1

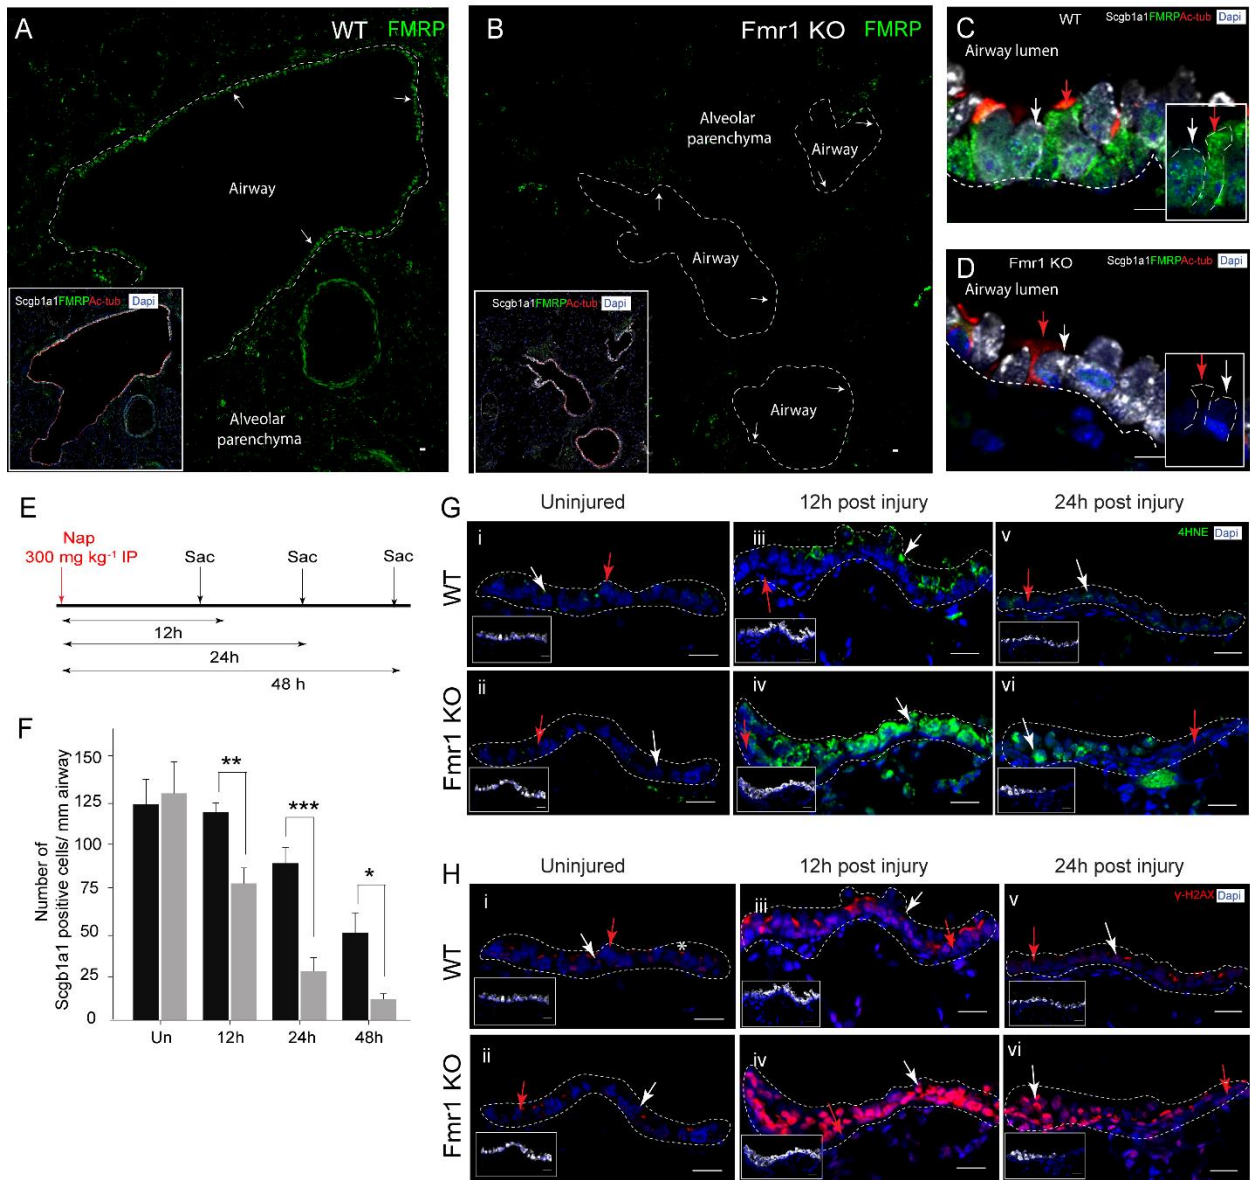

Figure-2

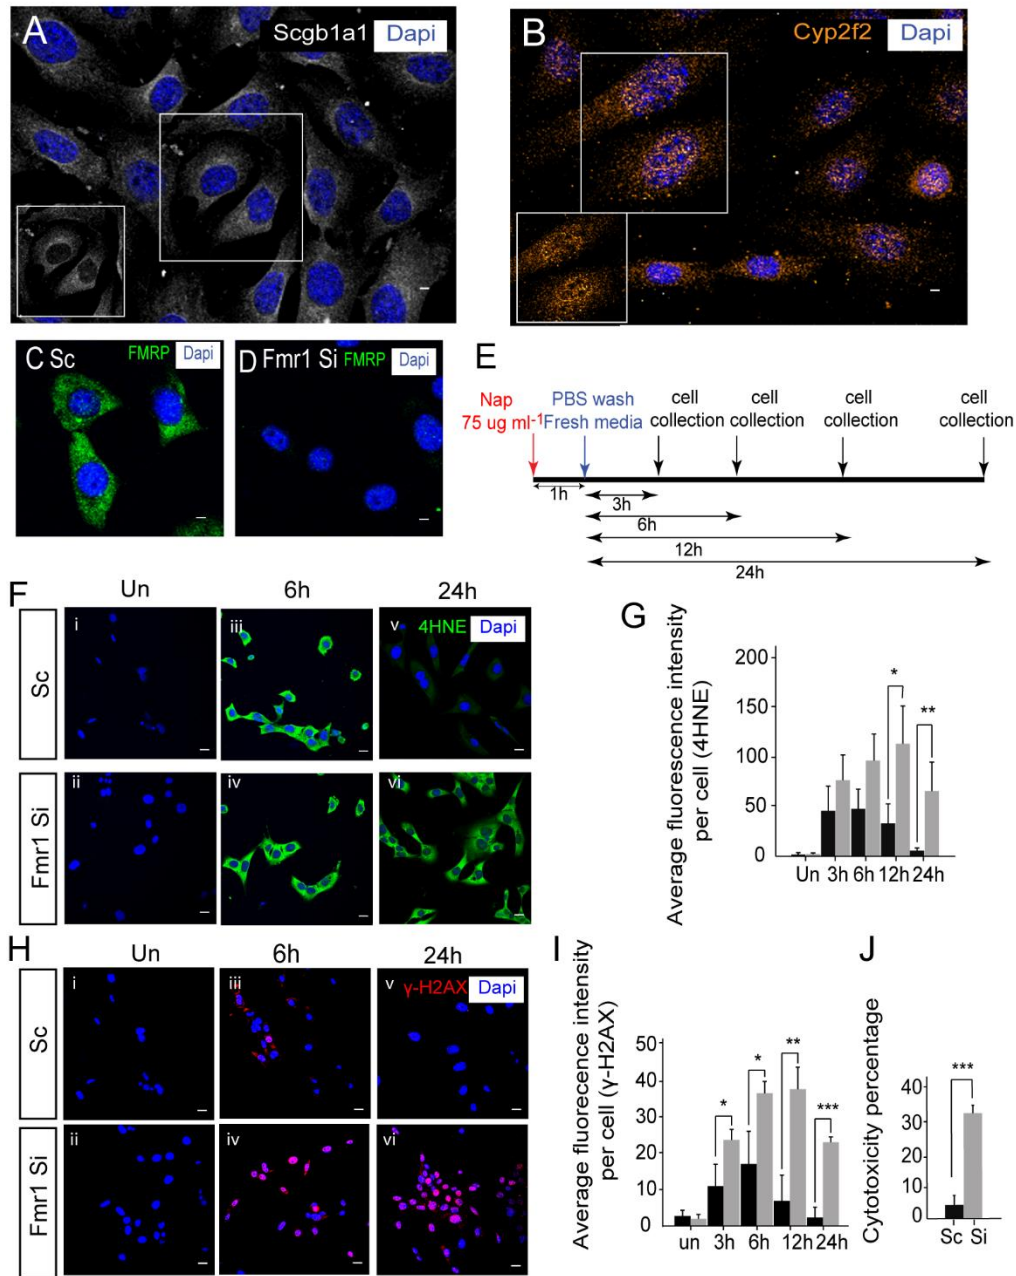

Figure-3

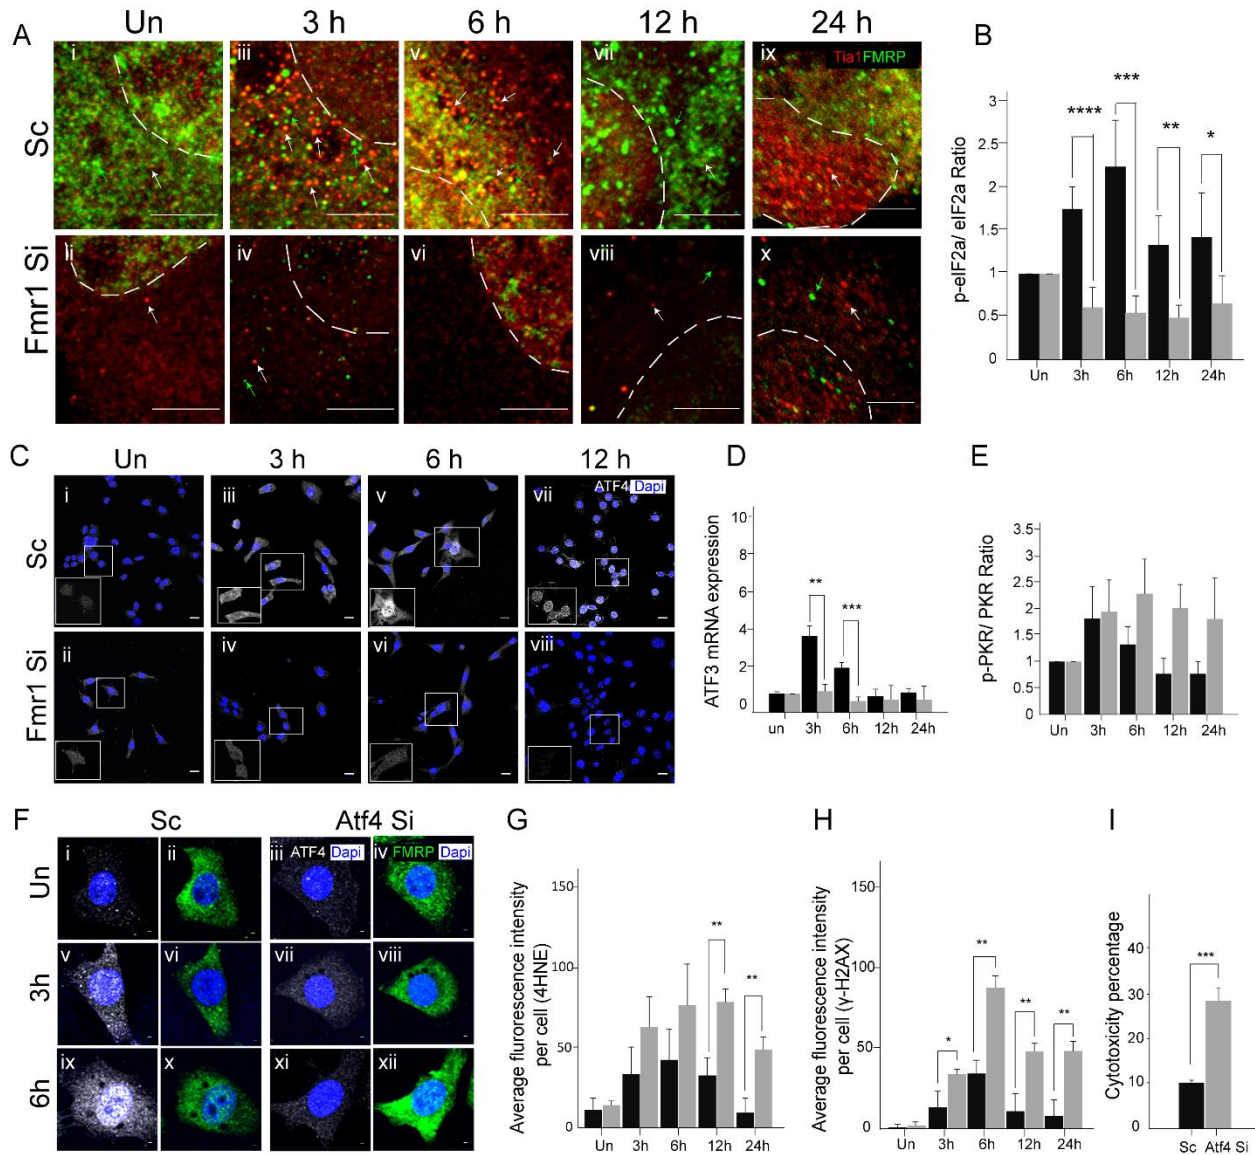

Figure-4

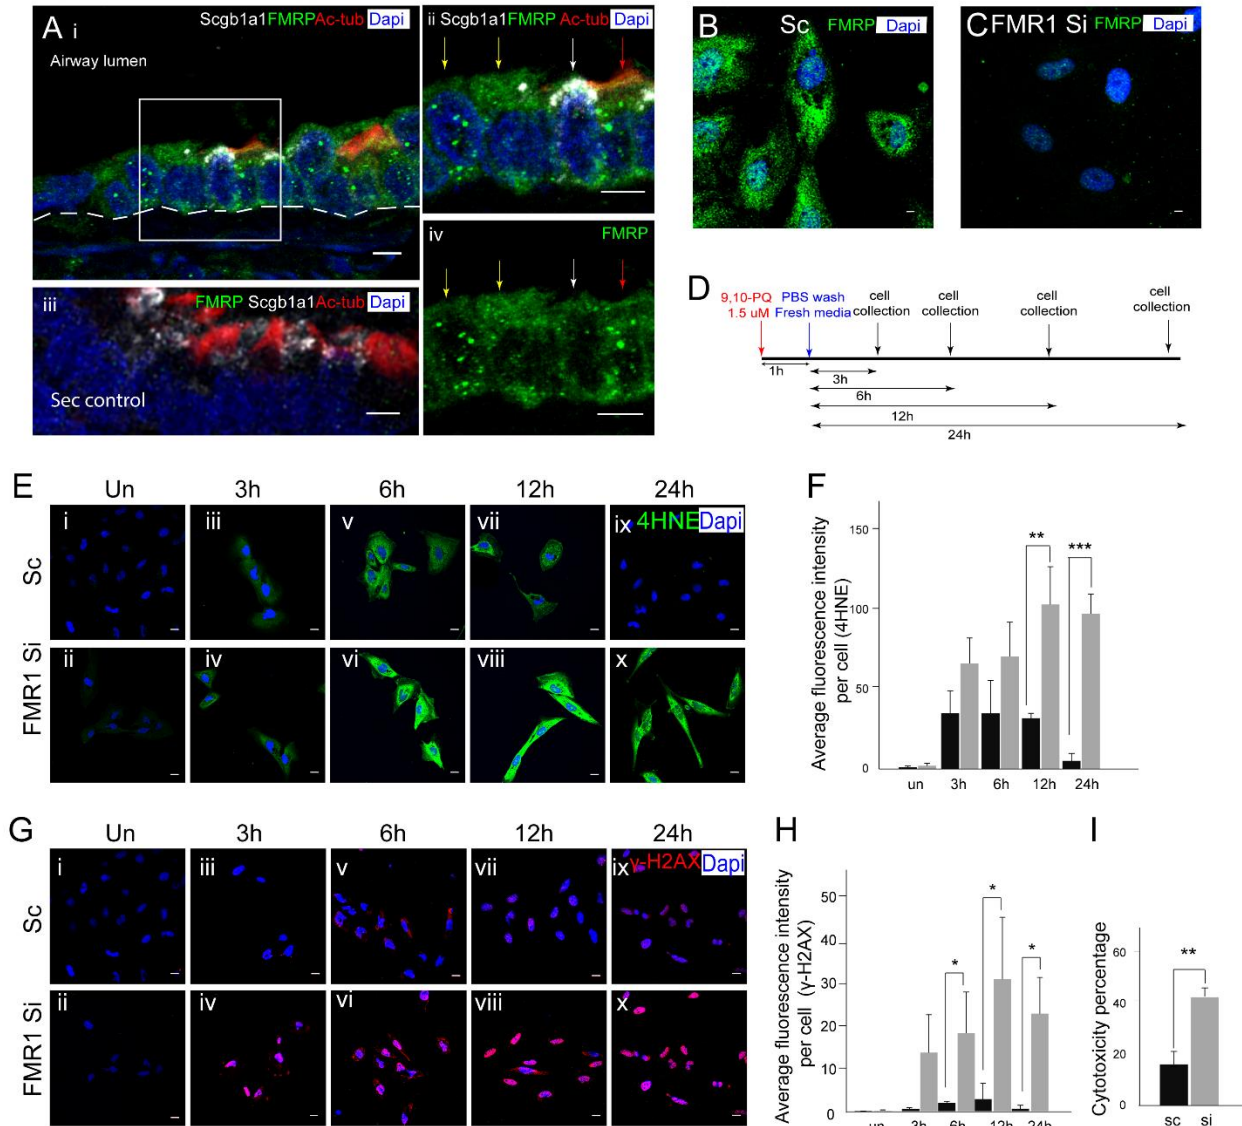

Figure-5

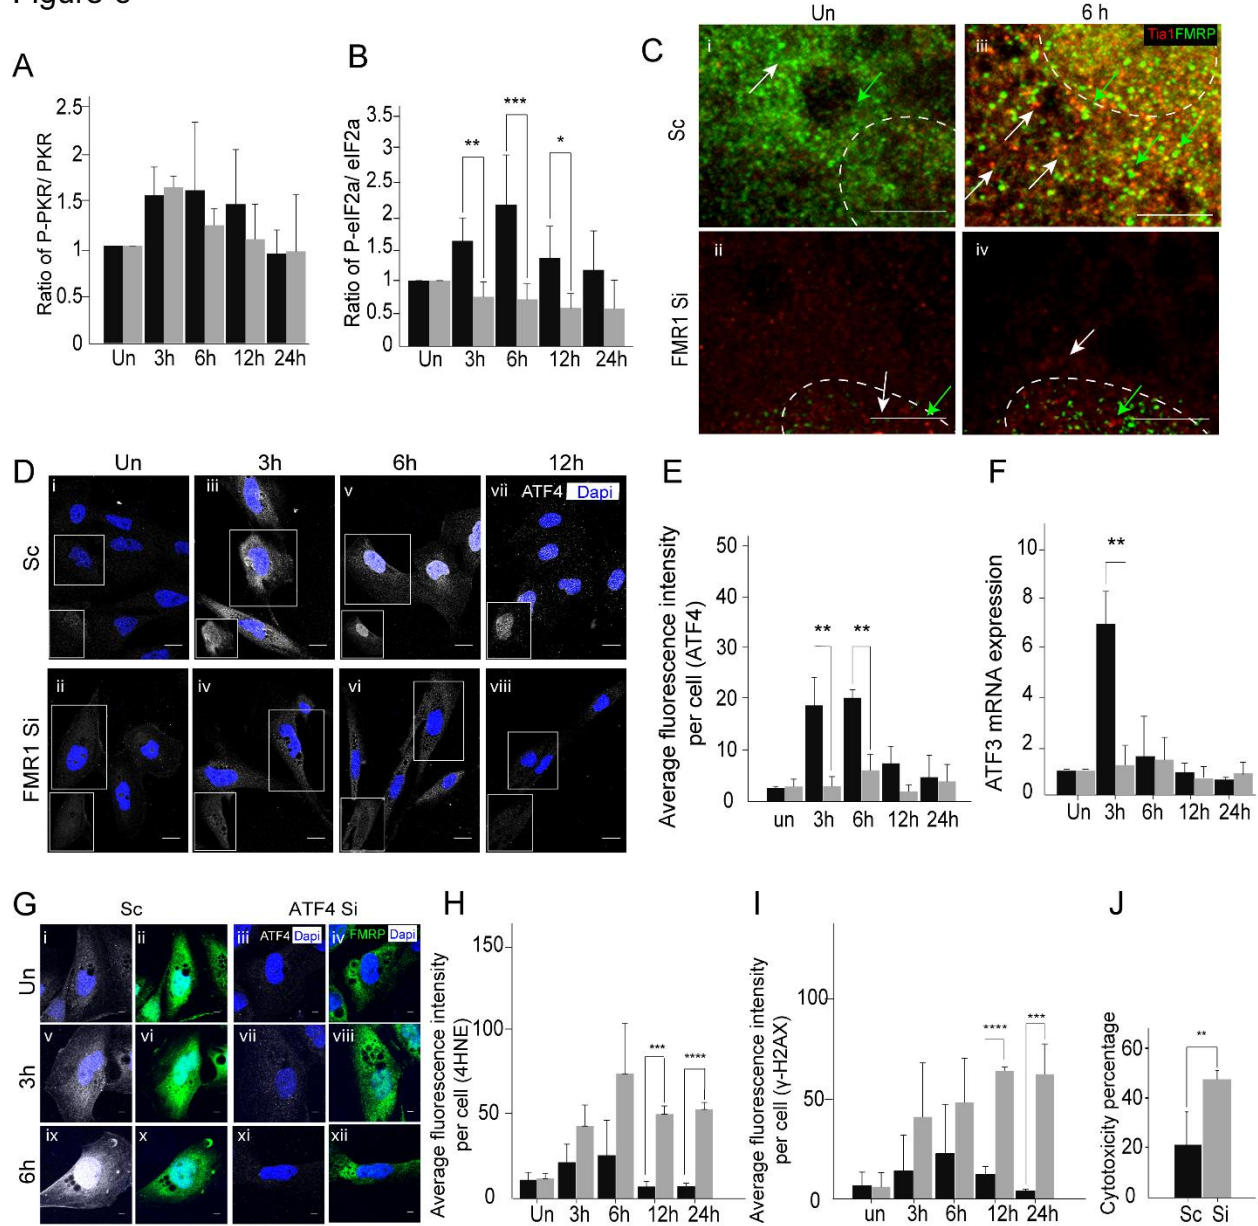

Figure-6

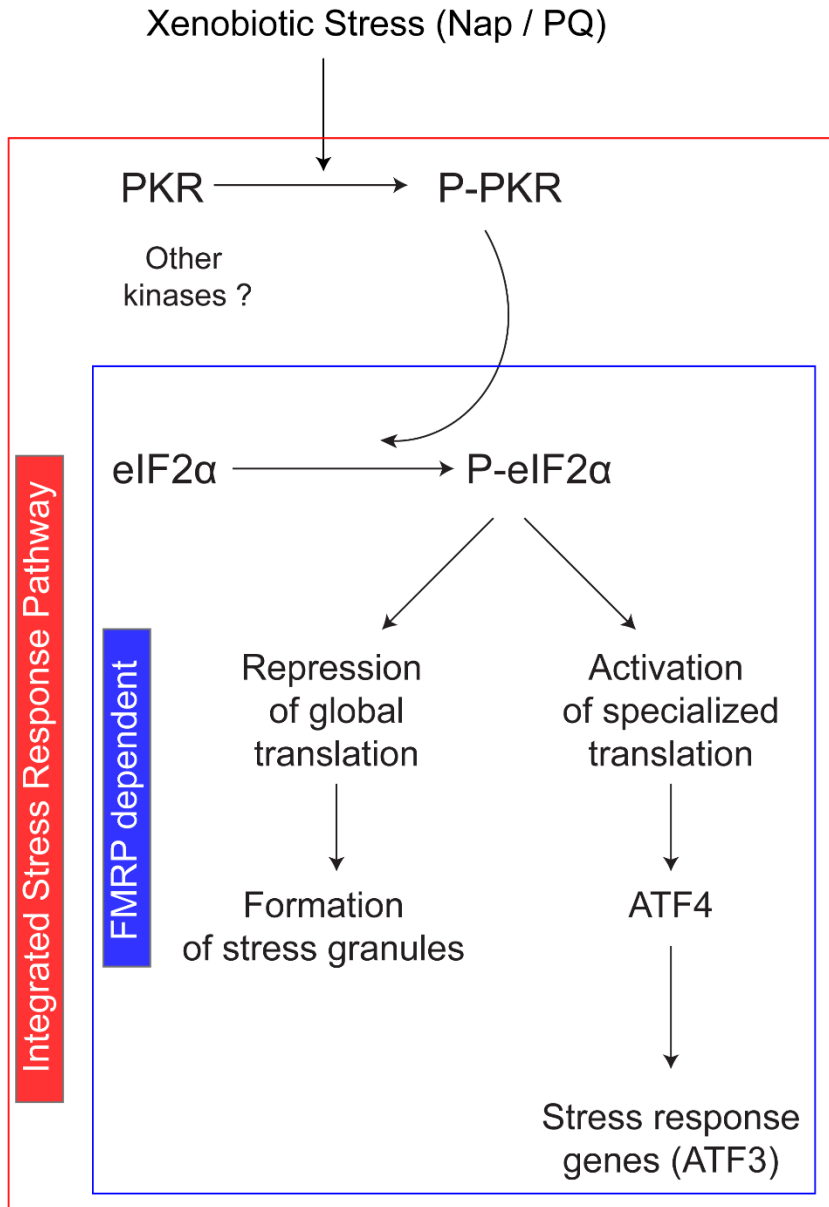



658 **FIGURE LEGENDS**

659 **Figure 1: FMRP is expressed in the airways and more broadly and protects airway**  
660 **Club cells from Naphthalene induced stress. (A-D)** FMRP expression in the murine  
661 lung. **(A)** Tiled image showing FMRP immunostaining (green, arrow) in the airway  
662 epithelium (demarcated by white dotted lines) and in the parenchyma of the murine lung.  
663 The airways are identified by expression of the Club cell (CC) marker Scgb1a1 (white,  
664 inset) and of the ciliated cell marker acetylated-Tubulin (red, inset). **(B)** Tiled image  
665 showing FMRP immunostaining in Fmr1 knockout (Fmr1 KO) mice. Note absence of  
666 FMRP (green) in both airway (demarcated by white dotted lines, inset) and parenchyma.  
667 **(C-D)** High resolution image of FMRP immunostaining (green) in airway epithelial cells.  
668 Shown here are CCs (white, white arrow in panel alongside) and ciliated cells (red, red  
669 arrow in panel alongside) in wild type **(C)** and Fmr1 KO **(D)**. **(E-H)** Susceptibility of CCs  
670 to Naphthalene (Nap) injury in control and Fmr1 KO. **(E)** Schematic showing regimen for  
671 Nap injury. **(F)** Frequencies of Scgb1a1<sup>+</sup> cells in wild type (black bars) and Fmr1 KO (grey  
672 bars) from uninjured (Un) and Nap-injured mice at different timepoints post injury. Data  
673 represents average + SD. **(G-H)** Expression of markers of oxidative (4HNE) and  
674 genotoxic ( $\gamma$ -H2AX) stress in airways from wild-type and Fmr1 KO mice prior to and post  
675 Nap. **(G i-G vi)** 4HNE immunostaining (green) in the airways of wild-type (upper panel)  
676 and Fmr1 KO (lower panel) mice prior to and post Nap. **(H i- H vi)**  $\gamma$ -H2AX immunostaining  
677 (red) in the airways of control (upper panel) and Fmr1 KO (lower panel) prior to and post  
678 Nap. Also see Fig S1. Statistical significance was assessed by an unpaired two-tailed t-  
679 test (see methods,  $p < .05^*$ ,  $p < .01^{**}$ ,  $p < .001^{***}$ ). The changes in the two groups over  
680 time, across genotype and interaction parameters were also assessed by two-way  
681 ANOVA and found to be statistically significant. For Shapiro-Wilk normality test and two-  
682 way ANOVA see Table S1. Scale Bar=20  $\mu$ m.

683 **Figure 2: FMRP deficient Club cell-like C22 cells are susceptible to Nap-induced**  
684 **stress. (A-D)** Phenotypic characterization of C22 cells. **(A)** Scgb1a1 immunostaining  
685 (white) in C22 cells. **(B)** Cyp2f2 (orange) immunostaining in C22 cells. **(C-D)** FMRP  
686 immunostaining in C22 cells **(C)** and in C22 cells treated with Fmr1 siRNA **(D)**. **(E-J)**

687 Susceptibility of C22 cells to Nap (control (scrambled siRNA-treated, Sc) and Fmr1  
688 siRNA-treated (Si)). **(E)** Schematic showing regimen for Nap injury. **(F-I)** Expression of  
689 markers of oxidative (4HNE) and genotoxic ( $\gamma$ -H2AX) stress in Sc and Si cells prior to and  
690 post Nap. **(F i- F vi)** 4HNE immunostaining (green) in Sc and Si cells prior to and post  
691 Nap. **(G)** Quantitation of 4HNE immunofluorescence per cell in Sc and Si cells prior to  
692 and post Nap ( $\geq 25$  cells were analysed per timepoint/per experiment, n=3 experiments).  
693 **(H i- H vi)**  $\gamma$ -H2AX immunostaining (red) in Sc and Si cells prior to and post Nap. **(I)**  
694 Quantitation of  $\gamma$ -H2AX immunofluorescence per cell in Sc and Si cells post Nap. **(J)**  
695 Cytotoxicity of Nap in Sc and Si cells 24 h post Nap (n=3 experiments). Black bars (Sc),  
696 Grey bars (Si). Unpaired two-tailed t-test ( $p < .05^*$ ,  $p < .01^{**}$ ,  $p < .001^{***}$ ). For normality test  
697 and two-way ANOVA see Table S2. Scale Bar=5  $\mu$ m.

698 **Figure 3: FMRP deficient C22 cells fail to upregulate the Integrated Stress**  
699 **Response and induce ATF4, essential for protection from Nap-induced stress. (A i**  
700 **- A x)** Expression of the stress granule marker Tia-1 (white, arrows) in control (Scrambled  
701 siRNA-treated, Sc) and Fmr1 siRNA-treated (Si) cells prior to and post Nap. Note that  
702 FMRP expression in the same cells (green, arrow) does not completely overlap with Tia-  
703 1. Also see Supplementary Figure 2 for Atx2/FMRP staining. **(B)** Western blot-based  
704 quantitation of phospho-eIF2 $\alpha$  /eIF2 $\alpha$  ratios in Sc and Si cells prior to and post Nap  
705 treatment (n=5 experiments). See Fig. S2 for representative blots used for quantitation.  
706 **(C i - C viii)** ATF4 immunostaining in Sc (upper panel) and Si cells (lower panel) prior to  
707 and post Nap. Note nuclear accumulation of ATF4 in Sc cells by 6 h post Nap (inset). See  
708 Fig. S2 for quantitation. **(D)** Quantitative RT-PCR-based analysis of expression of the  
709 ATF4 target gene ATF3 in Sc and Si cells prior to and post Nap (n=3 experiments). **(E)**  
710 Western blot-based quantitation of phospho-PKR/ PKR ratios in Sc and Si cells prior to  
711 and post Nap treatment (n=3 experiments). See Fig S2 for representative blots used for  
712 quantitation. **(F-I)** Susceptibility of C22 cells to Nap in control (Scrambled siRNA-treated,  
713 Sc) and Atf4 siRNA-treated (Si) cells. **(F i - F xii)** Analysis of ATF4 levels (white) in Sc  
714 and Si cells prior to and post Nap treatment. Immunostaining for ATF4 (white) and FMRP  
715 (green) in Sc (left panel) and Si (right panel) cells. **(G)** Quantitation of 4HNE

716 immunofluorescence per cell in Sc and Si cells prior to and post Nap. See Fig S2 for  
717 representative images **(H)** Quantitation of  $\gamma$ -H2AX immunofluorescence per cell in Sc and  
718 Si. See Fig. S2 for representative images. **(I)** Cytotoxicity of Nap in Sc and Si cells 24 h  
719 post Nap exposure (n=3 experiments). Black bars (Sc), Grey bars (Si). Unpaired two-  
720 tailed t-test ( $p < .05^*$ ,  $p < .01^{**}$ ,  $p < .001^{***}$ ). For normality test and two-way ANOVA see  
721 Table S3. Scale Bar=5  $\mu$ m.

722 **Figure 4: FMRP is expressed in the human airways and protects human bronchial**  
723 **BEAS-2B cells from 9, 10-Phenanthrenequinone-induced stress. (A-C)** FMRP  
724 expression in the human lung and in BEAS-2B cells, a cell line derived from the human  
725 bronchial epithelium. **(A i - A iv)** FMRP immunostaining (green) in the distal airways of  
726 the human lung. **(A i, A ii, A iv)** Stained section showing FMRP expression in airway  
727 non-ciliated cells (Scgb1a1+ (white), white arrows; Scgb1a1-, yellow arrows) and ciliated  
728 cells (red, red arrow). Boxed area shown at higher magnification in top and bottom panels  
729 on the right. Negative control (secondary alone) for FMRP immunostaining shown in **A**  
730 **iii.** **(B)** FMRP immunostaining of BEAS-2B cells. **(C)** FMRP immunostaining of FMR1  
731 siRNA-treated BEAS-2B cells. **(D-I)** Susceptibility of BEAS-2B cells to PQ injury in control  
732 (Scrambled siRNA-treated, Sc) and Fmr1 siRNA-treated (Si) cells. **(D)** Schematic  
733 showing regimen for PQ injury. **(E-H)** Expression of markers of oxidative (4HNE) and  
734 genotoxic ( $\gamma$ -H2AX) stress in Sc and Si cells prior to and post PQ. **(E i - E x)** 4HNE  
735 immunostaining (green) in Sc and Si cells prior to and post PQ. **(F)** Quantitation of 4HNE  
736 immunofluorescence per cell in Sc and Si cells post PQ ( $\geq 25$  cells were analysed per  
737 timepoint/per experiment, n=3 experiments). **(G i - G x)**  $\gamma$ -H2AX immunostaining (red) in  
738 Sc and Si cells prior to and post PQ. **(H)** Quantitation of  $\gamma$ -H2AX immunofluorescence per  
739 cell in Sc and Si cells post PQ. **(I)** Cytotoxicity of PQ in Sc and Si cells 24 h post PQ  
740 exposure (n=3 experiments). Black bars (Sc), Grey bars (Si). Unpaired two-tailed t-test  
741 ( $p < .05^*$ ,  $p < .01^{**}$ ,  $p < .001^{***}$ ). For normality test and two-way ANOVA see Table S4.  
742 Scale Bar=5  $\mu$ m.

743 **Figure 5: FMRP deficient BEAS-2B cells fail to upregulate the Integrated Stress**  
744 **Response and induce ATF4, essential for protection from 9, 10-**  
745 **Phenanthrenequinone induced stress. (A)** Western blot-based quantitation of  
746 phospho-PKR/ PKR ratios in Sc and Si cells prior to and post Nap treatment (n=3  
747 experiments). See Fig. S4 for representative blots used for quantitation. **(B)** Western blot-  
748 based quantitation of phospho-eIF2 $\alpha$  /eIF2 $\alpha$  ratios in Sc and Si cells prior to and post PQ  
749 treatment (n=5 experiments). See Fig. S4 for representative blots used for quantitation.  
750 **(C i-C iv)** Expression of the stress granule marker Tia-1(white, arrows) in control  
751 (Scrambled siRNA-treated, Sc) and Fmr1 siRNA-treated (Si) cells prior to and post PQ.  
752 Note that FMRP expression in the same cells (green, arrow) does not completely overlap  
753 with Tia-1. Also see Fig. S4 for G3BP/FMRP staining. **(D-E)** Analysis of ATF4 prior to  
754 and post PQ. **(D)** ATF4 immunostaining in Sc (upper panel) and Si cells (lower panel)  
755 prior to and post PQ treatment. Note nuclear accumulation of ATF4 in Sc cells by 6 h post  
756 PQ treatment (inset). **(E)** Quantitation of ATF4 immunofluorescence per cell in Sc and Si  
757 cells prior to and post PQ. **(F)** Quantitative RT-PCR-based analysis of expression of ATF3  
758 in Sc and Si cells prior to and post PQ (n=3 experiments). **(G-J)** Susceptibility of BEAS-  
759 2B cells to PQ in control (Scrambled siRNA-treated, Sc) and Atf4 siRNA-treated (Si) cells.  
760 **(G i - G xii)** Analysis of ATF4 levels (white) and FMRP (green) in Sc (left panel) and Si  
761 (right panel) cells prior to and post PQ treatment. Immunostaining for ATF4 (white) and  
762 FMRP (green) in Sc (left panel) and Si (right panel) cells. **(H)** Quantitation of 4HNE  
763 immunofluorescence per cell in Sc and Si. See Fig. S4 for representative images. **(I)**  
764 Quantitation of  $\gamma$ -H2AX immunofluorescence per cell in Sc and Si. See Fig. S4 for  
765 representative images. **(J)** Cytotoxicity of PQ in Sc and Si cells 24 h post PQ treatment  
766 (n=3 experiments). Black bars (Sc), Grey bars (Si). Unpaired two-tailed t-test ( $p < .05^*$ ,  $p <$   
767  $.01^{**}$ ,  $p < .001^{***}$ ). For normality test and two-way ANOVA see Table S5. Scale Bar=5  
768  $\mu$ m.

769 **Figure 6: Model for the role of FMRP in the regulation of the Integrated Stress**  
770 **Response in the lung.** Exposure to xenobiotics such as Naphthalene (Nap) and 9,10-  
771 Phenanthrenequinone (PQ) result in the activation of at least one of four stress-

772 responsive kinases (PKR) and to the induction of Integrated Stress Response Pathway  
773 (ISR, outlined in red). Our findings suggest that FMRP has an essential role downstream  
774 to PKR phosphorylation (outline in blue).
